# Supplementary material for: High-performance Bi2Se3/MXene/SWCNT heterostructures as binder-free anodes in lithium-ion batteries
Source: Royal Society of Chemistry journal article supplement (doi:10.1039/d3qm01290e), 2024-01-01
Supplement: d3qm01290e1.pdf [file d3qm01290e1.pdf]

## High-performance $\text{Bi}_2\text{Se}_3/\text{MXene}/\text{SWCNT}$ heterostructures as binder-free anodes in lithium-ion batteries

Raimonds Meija<sup>1</sup>, Vitalijs Lazarenko<sup>1,2</sup>, Yelyzaveta Rublova<sup>1,2</sup>, Andrei Felsharuk<sup>1</sup>, Jana Andzane<sup>1</sup>, Oleksiy Gogotsi<sup>3</sup>, Ivan Baginskiy<sup>3</sup>, Veronika Zahorodna<sup>3</sup>, Aleksandrs Dutovs<sup>1</sup>, Arturs Viksna<sup>4</sup>, Donats Erts<sup>1,4</sup>

<sup>1</sup>Institute of Chemical Physics, University of Latvia, Raina Blvd. 19, LV-1586 Riga, Latvia

<sup>2</sup>Nano RAY-T, Instituta str. 1, Ulbroka, LV-2130, Stopinu Parish, Latvia

<sup>3</sup>Materials Research Center, 03680, St. Ak. Krzhizhanovskogo, 3 Kiev, Ukraine

<sup>4</sup>Faculty of Chemistry, University of Latvia, Raina Blvd. 19, LV-1586 Riga, Latvia

### Supplementary information

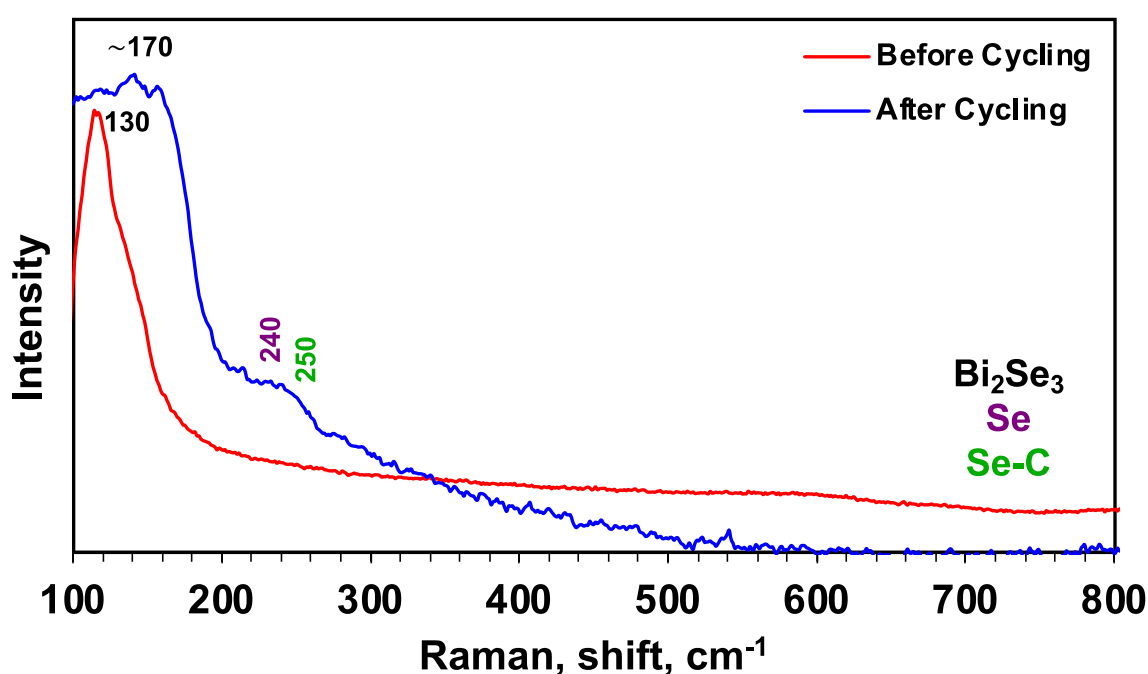

**Supplementary Figure S1.** The Raman spectra of  $\text{Bi}_2\text{Se}_3/\text{MXene}/\text{SWCNT}$  (1:1:2) before and after cycling.

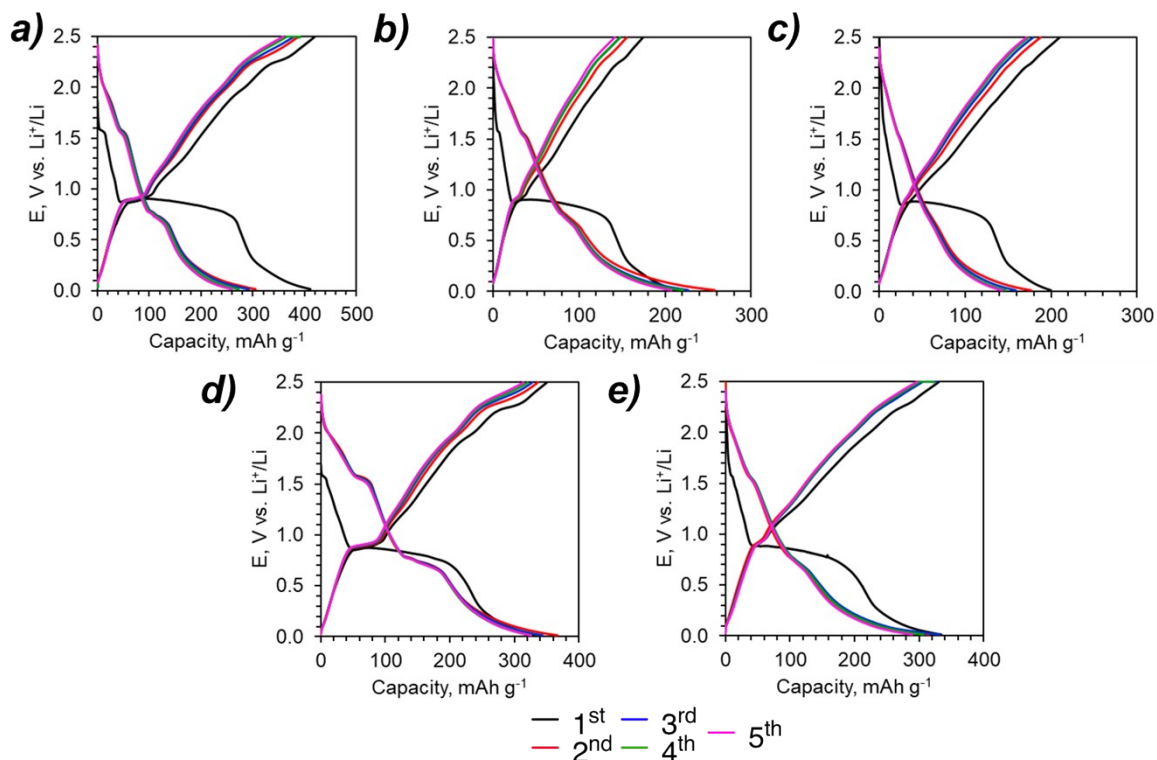

**Supplementary Figure S2.** Charge discharge curves for first 5 cycles for following  $\text{Bi}_2\text{Se}_3/\text{MXene}/\text{SWCNT}$  element compositions: **a)** (1:1:1), **b)** (1:2:2), **c)** (2:1:1), **d)** (1.5:2:0.5), **e)** (0.5:2:1.5).

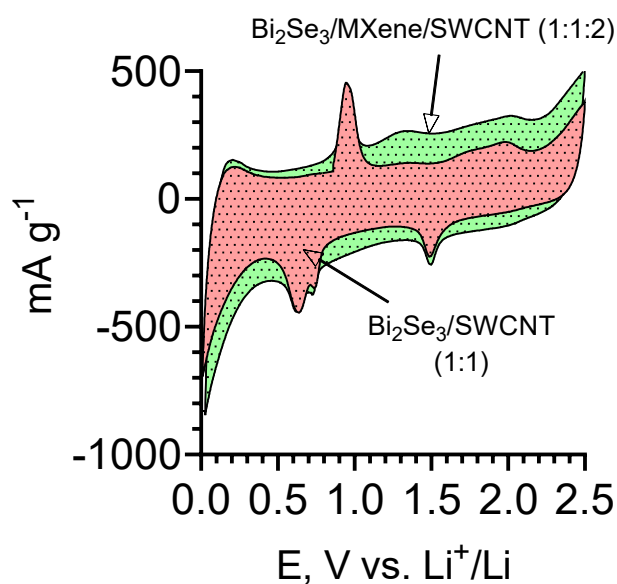

**Supplementary Figure S3.** The capacitive process comparison from the CV curve area plots between  $\text{Bi}_2\text{Se}_3/\text{SWCNT}$  (1:1) and  $\text{Bi}_2\text{Se}_3/\text{MXene}/\text{SWCNT}$  (1:1:2) at the scan rate  $1.0 \text{ mV s}^{-1}$ .
